# Supplementary material for: Re-determination of the structure of an anionic oxo-vanadium arsenate framework
Source: Royal Society of Chemistry journal article supplement (doi:10.1039/c0dt00683a), 2010-01-01
Supplement: c0dt00683a.pdf [file c0dt00683a.pdf]

**Supplementary information for:**

**Re-determination of the Structure of an Anionic  
Oxo-vanadium Arsenate Framework**

by

V. Soghomonian, C. Slebodnick, and E. C. Spencer

Infrared spectrum  
Elemental analysis

Supplementary Material (ESI) for Dalton Transactions  
 This journal is © The Royal Society of Chemistry 2010  
 IR spectrum of complex 1 with  $[(As_6V_{12}V_3O_{51})_n]_{\infty}$  framework formula

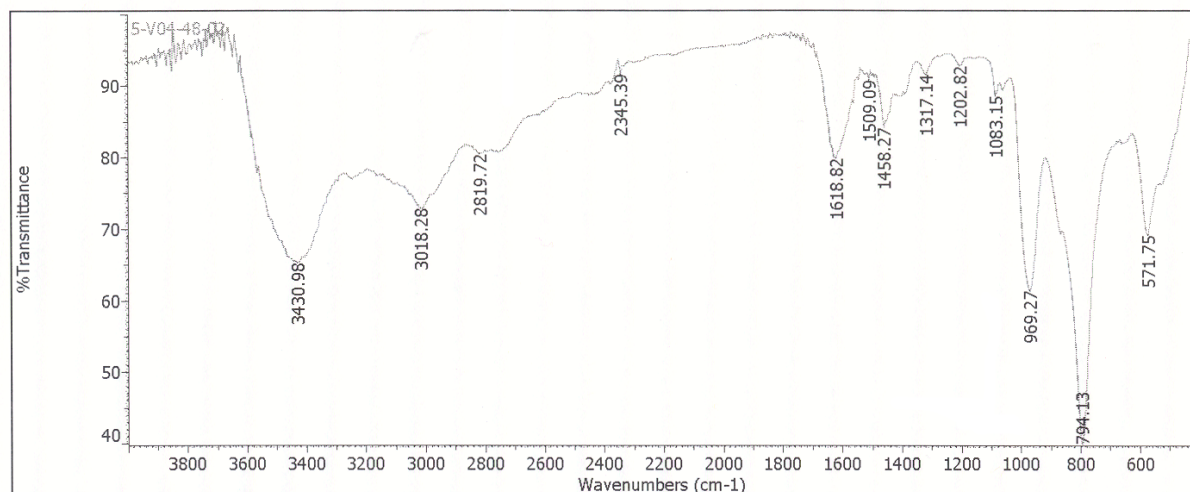

**Peak finding results for: 5-V04-48-02**

Frequency: 406.75 - 3993.25, threshold: 99.216-95.000, sensitivity: 59.00

Peak finding result table:

|          |         |         |         |         |         |         |         |         |
|----------|---------|---------|---------|---------|---------|---------|---------|---------|
| Peak#    | 1       | 2       | 3       | 4       | 5       | 6       | 7       | 8       |
| Position | 3904.99 | 3872.76 | 3855.45 | 3840.69 | 3822.89 | 3803.30 | 3770.92 | 3752.72 |
| Height   | 92.731  | 92.855  | 91.902  | 93.204  | 93.676  | 94.377  | 94.964  | 94.224  |
| Peak#    | 9       | 10      | 11      | 12      | 13      | 14      | 15      | 16      |
| Position | 3677.83 | 3650.83 | 3630.51 | 3430.98 | 3018.28 | 2819.72 | 2345.39 | 1618.82 |
| Height   | 94.917  | 94.038  | 91.787  | 65.076  | 72.682  | 80.379  | 91.490  | 79.683  |
| Peak#    | 17      | 18      | 19      | 20      | 21      | 22      | 23      | 24      |
| Position | 1509.09 | 1458.27 | 1317.14 | 1202.82 | 1083.15 | 969.27  | 794.13  | 571.75  |
| Height   | 90.636  | 83.999  | 91.465  | 92.734  | 88.407  | 61.208  | 39.703  | 68.959  |

The IR spectrum of complex 1 exhibits the following prominent band, in  $cm^{-1}$ : For the extra-framework species, O-H and N-H stretching vibrations from the water and piperazinium ions; N-H bending vibrations around 1620, and C-N and C-H vibrations of the piperazinium ion in the region 1000 to 1500. For the framework, terminal V=O vibrations around 960, As-O vibrations around 800.

The spectrum was recorded on a Thermo Scientific Nicolet IR100 FT-IR instrument. Complex 1 was dispersed in a KBr pellet. 16 scans were recorded on the complex, and the background spectrum subtracted.

**August 22, 2008****Revised Report 9/16/08****Client:** VIRGINIA TECH  
Dept. of Physics  
Robeson 311 (0435)  
Blacksburg, VA 24061**Attn:** Vicki Soghomonian**Project:** P9018684**Date Received:** August 18, 2008**Certificate of Analysis**

| <b>Sample ID:</b> | <b>Lab #:</b> |  | <b>Carbon</b><br>% | <b>Hydrogen</b><br>% | <b>Nitrogen</b><br>% | <b>Arsenic</b><br>% | <b>Vanadium</b><br>% |
|-------------------|---------------|--|--------------------|----------------------|----------------------|---------------------|----------------------|
| V04-29-14         | 13085         |  | 7.00               | 3.58                 | 4.29                 | 16.5                | 26.5                 |
| duplicate         |               |  | 6.93               | 3.27                 | 4.27                 | 16.0                | 25.1                 |

**4-6 Day Rush****Notes:****CHN analyzed with  $WO_3$  catalyst. Replicate CHN verifies reported values.****Revised Report 9/16/08: Reported duplicate values that were analyzed during the original analyses.**

---

**Ralph V. Poulsen, Lab Manager****3860 S. Palo Verde Rd.  
Suite 302  
Tucson, AZ 85714  
520.623.3381**
